# Supplementary figures and images for: Biphenyl furanocoumarin compounds inhibit SARS-CoV-2 spike pseudovirus infection by binding ACE2
Source: Royal Society of Chemistry journal article supplement (doi:10.1039/d2nj05019f), 2023-01-01

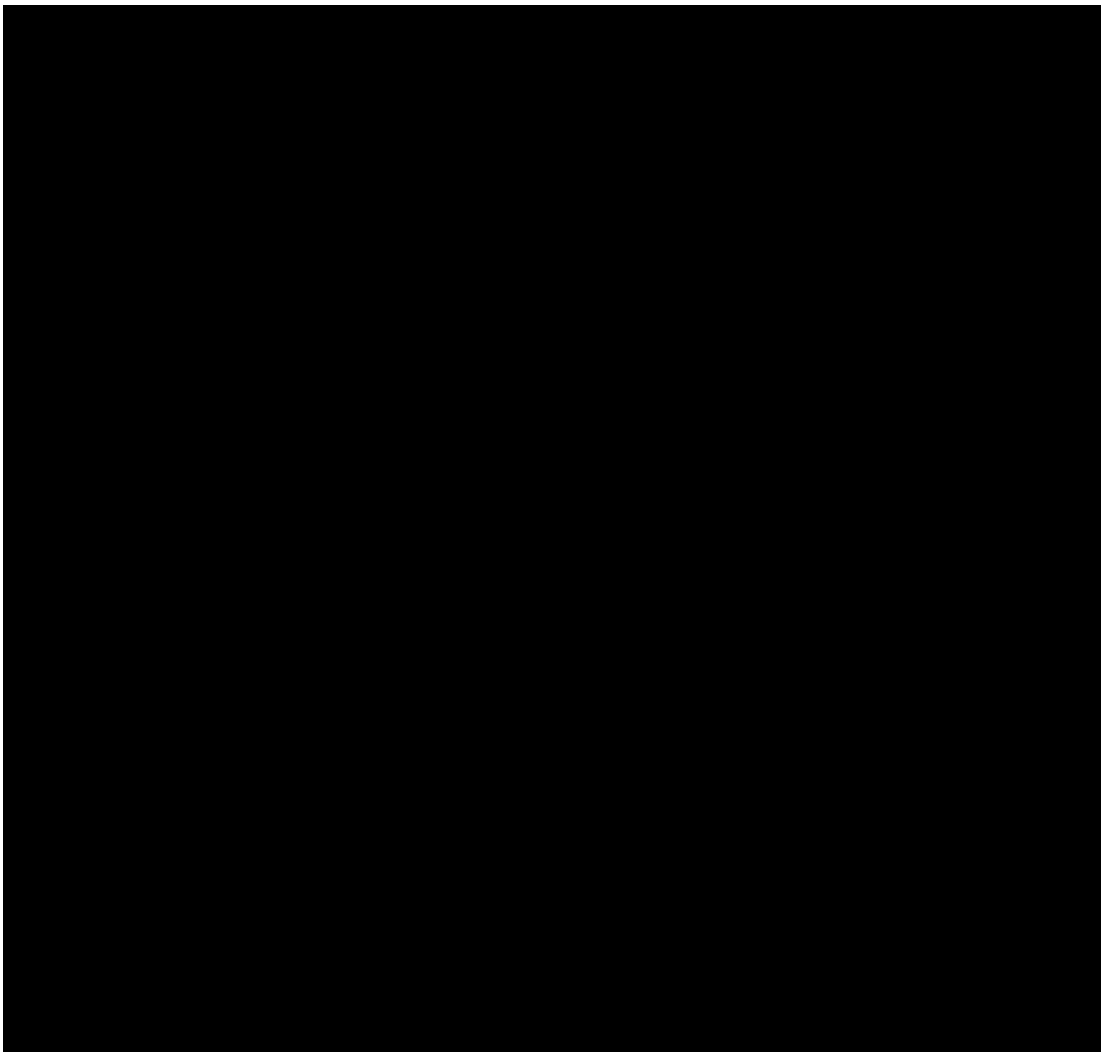

Supplement: d2nj05019f2.pdf [file d2nj05019f2.pdf]

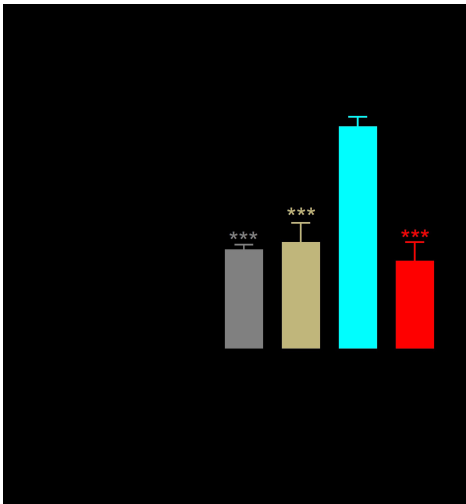

Supplement: d2nj05019f3.pdf [file d2nj05019f3.pdf]
